# Supplementary material for: ROCK Inhibitor-Induced Promotion of Retinal Pigment Epithelial Cell Motility during Wound Healing
Source: J Ophthalmol. 2019 Jun 19;2019:9428738. doi: 10.1155/2019/9428738 (PMC6607728; doi:10.1155/2019/9428738)
Supplement: Supplementary Materials — Supplementary digital contents demonstrated the imaging of cell migration distance (Movie S1: NT; Movie S2: Y27632) and cell coverage percentage (Movie S3: NT; Movie S4: Y27632). [file 9428738.f1.zip]

Archive with 4 entries (4 files):
- Movie S1.avi
- Movie S2.avi
- Movie S3.mp4
- Movie S4.mp4
